# Supplementary material
Source: PubMed Central journal article supplement (PMC6644400)
Supplement: ao7b00848_si_001.pdf [file ao7b00848_si_001.pdf]

## Supporting Information

### Magnetic Co-doped MoS<sub>2</sub> nanosheets for efficient Catalysis of Nitroarene Reduction

Nethravathi C., Janak Prabhu, Lakshmi Priya S., Michael Rajamathi\*

Materials Research Group, Department of Chemistry, St. Joseph's College, 36 Lalbagh Road, Bangalore 560027, India. \*E-mail: [mikerajamathi@rediffmail.com](mailto:mikerajamathi@rediffmail.com)

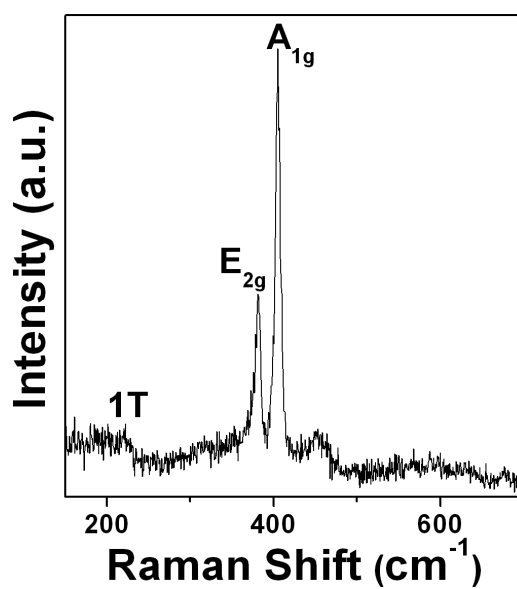

*Figure S1:* Raman spectrum of Co-doped MoS<sub>2</sub>

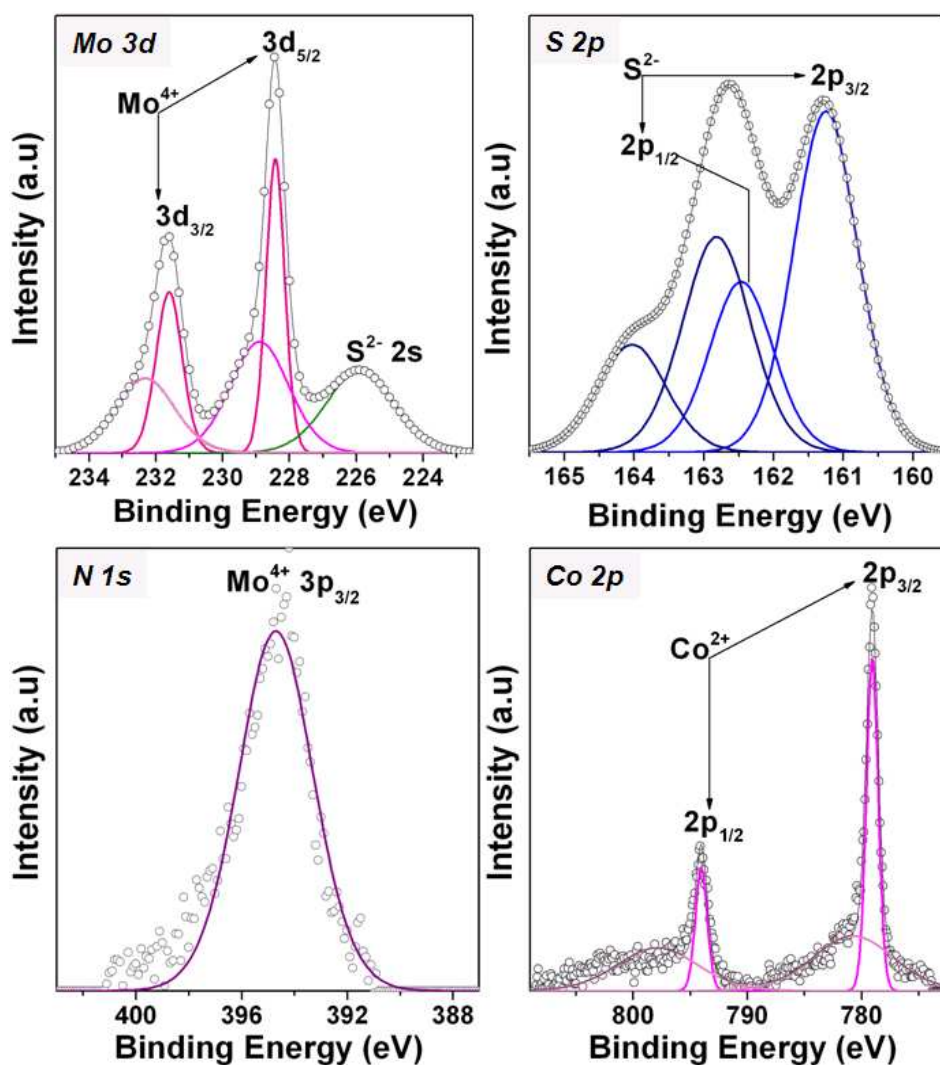

| Binding Energies (eV)                               |               |       |                 |               |               |
|-----------------------------------------------------|---------------|-------|-----------------|---------------|---------------|
|                                                     | Mo 3d         | phase | S 2p            | Co 2p         | N 1s          |
| Co <sub>0.1</sub> Mo <sub>0.78</sub> S <sub>2</sub> | 228.4 & 231.6 | 1T    | 161.25 & 162.43 | 779.2 & 794.0 | <i>absent</i> |
|                                                     | 228.8 & 232.3 | 2H    | 162.81 & 164.02 |               |               |

**Figure S2:** XPS spectra of showing Mo 3d, S 2p, N 1s and Co 2p core level peak regions of Co doped MoS<sub>2</sub> treated with 1N HCl. The binding energies are summarized in the table.
